# Supplementary material for: Reaction dynamics of P( 4 S) + O 2 (X 3 Σ − g ) → O( 3 P) + PO(X 2 Π) on a global CHIPR potential energy surface of PO 2 (X 2 A 1 ): implications for atmospheric modelling
Source: Copernicus journal article supplement (doi:10.5194/acp-23-10643-2023), 2023-09-26
Supplement: Supplementary file 1 [file acp-23-10643-2023-supplement.zip]

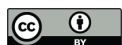

*Supplement of*

**Reaction dynamics of  $\text{P}(^4\text{S}) + \text{O}_2(\text{X}^3\Sigma_g^-) \rightarrow \text{O}(^3\text{P}) + \text{PO}(\text{X}^2\Pi)$   
on a global CHIPR potential energy surface of  $\text{PO}_2(\text{X}^2\text{A}_1)$ :  
implications for atmospheric modelling**

**Guangan Chen et al.**

*Correspondence to:* Zhi Qin (z.qin@sdu.edu.cn) and Linhua Liu (liulinhua@sdu.edu.cn)

- acp-23-10643-2023-supplement-title-page.pdf
- Supplement
  - PES\_PO2.f

The copyright of individual parts of the supplement might differ from the article licence.
